# Supplementary material
Source: HighWire-hosted journal article supplement (https://thorax.bmj.com/content/76/2/161)
Supplement: inline-supplementary-material-1 [file inline-supplementary-material-1.pdf]

## Supplementary Section 1

### **UK Lung Cancer Screening Questionnaire.**

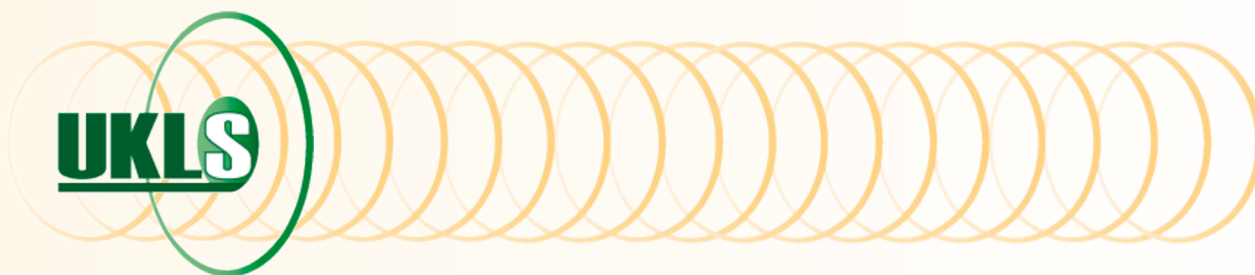

## UK Lung Cancer Screening Questionnaire

**All the information you give us is treated as strictly confidential and will only be used in our research**

**Please complete the questionnaire in black ink and return in the freepost envelope provided**

## HOW TO FILL IN THIS QUESTIONNAIRE

This questionnaire will be processed automatically. For this reason it is important that:

- the questionnaire does not crease;
- this questionnaire is filled out with a **black** or **blue pen** (no red or green felt pen)

### Example 1:

Gender ☐ Male ☒ Female (you have indicated that you are a female)

*If you have ticked accidentally the wrong checkbox, you must shade this box entirely.*

Gender ☒ Male ☐ Female (you have now indicated that you are a male)

Please fill out this kind of questions in block letters and figures.

### Example 2:

Post Code      L 3 9 T A

|                |                                |                                 |                                |                                |                                |                              |
|----------------|--------------------------------|---------------------------------|--------------------------------|--------------------------------|--------------------------------|------------------------------|
| Title          | <input type="checkbox"/> Mr    | <input type="checkbox"/> Mrs    | <input type="checkbox"/> Miss  | <input type="checkbox"/> Ms    | <input type="checkbox"/> Other | <input type="text"/>         |
| Surname        | <input type="text"/>           |                                 |                                |                                |                                |                              |
| First Name     | <input type="text"/>           |                                 |                                |                                |                                |                              |
| House Number   | <input type="text"/>           | Post Code                       |                                | <input type="text"/>           |                                |                              |
| Street         | <input type="text"/>           |                                 |                                |                                |                                |                              |
| Gender         | <input type="checkbox"/> Male  | <input type="checkbox"/> Female |                                |                                |                                |                              |
| Age            | <input type="checkbox"/> 50-55 | <input type="checkbox"/> 56-60  | <input type="checkbox"/> 61-65 | <input type="checkbox"/> 66-70 | <input type="checkbox"/> 71-75 | <input type="checkbox"/> 76+ |
| Date of Birth  | <input type="text"/>           | <input type="text"/>            | <input type="text"/>           | <input type="text"/>           | day month year                 |                              |
| Reference Code | <input type="text"/>           | <input type="text"/>            | <input type="text"/>           | <input type="text"/>           |                                |                              |

**SECTION 1 Questions about your health and job****1. Have you ever been diagnosed with any of the following conditions?**

(If yes, please indicate the age at diagnosis for that condition)

|              | Yes                      | No                       | Age at Diagnosis         |                          |                          |                          |                          |                          |                          |
|--------------|--------------------------|--------------------------|--------------------------|--------------------------|--------------------------|--------------------------|--------------------------|--------------------------|--------------------------|
|              |                          |                          | Less than 40             | 40-49                    | 50-55                    | 56-60                    | 61-65                    | 66-70                    | 70+                      |
| Asthma       | <input type="checkbox"/> |
| Bronchitis   | <input type="checkbox"/> |
| Emphysema    | <input type="checkbox"/> |
| Pneumonia    | <input type="checkbox"/> |
| Tuberculosis | <input type="checkbox"/> |
| COPD         | <input type="checkbox"/> |

**2. Have you ever had any of the following masses, lumps or tumours that were diagnosed as malignant or cancerous?**

|                  | Yes                      | No                       |
|------------------|--------------------------|--------------------------|
| Hodgkins Disease | <input type="checkbox"/> | <input type="checkbox"/> |
| Leukaemia        | <input type="checkbox"/> | <input type="checkbox"/> |
| Lymphoma         | <input type="checkbox"/> | <input type="checkbox"/> |
| Mesothelioma     | <input type="checkbox"/> | <input type="checkbox"/> |
| Skin growths     | <input type="checkbox"/> | <input type="checkbox"/> |

If Cancer see question 3

**3. Complete a separate section for each Cancer**

| Type of cancer | Tumour                   | Years since diagnosis    |                          |
|----------------|--------------------------|--------------------------|--------------------------|
|                |                          | Within 5 years           | Greater than 5 years     |
| Brain          | <input type="checkbox"/> | <input type="checkbox"/> | <input type="checkbox"/> |
| Head/Neck      | <input type="checkbox"/> | <input type="checkbox"/> | <input type="checkbox"/> |
| Oesophagus     | <input type="checkbox"/> | <input type="checkbox"/> | <input type="checkbox"/> |
| Lung           | <input type="checkbox"/> | <input type="checkbox"/> | <input type="checkbox"/> |
| Breast         | <input type="checkbox"/> | <input type="checkbox"/> | <input type="checkbox"/> |
| Colon (Bowel)  | <input type="checkbox"/> | <input type="checkbox"/> | <input type="checkbox"/> |
| Other          | <input type="checkbox"/> | <input type="checkbox"/> | <input type="checkbox"/> |

**4. Can you recall any job or activity in which you were exposed to asbestos?**☐ Yes ☐ No**If yes, how many years in total were you exposed to asbestos?**☐ 1 ☐ 2 ☐ 3 ☐ 4+

**SECTION 2 Family history of cancer****1. How many brothers, sisters, sons and daughters (first degree relatives) do you have?**

|           | 1                        | 2                        | 3                        | 4+                       |
|-----------|--------------------------|--------------------------|--------------------------|--------------------------|
| Brothers  | <input type="checkbox"/> | <input type="checkbox"/> | <input type="checkbox"/> | <input type="checkbox"/> |
| Sisters   | <input type="checkbox"/> | <input type="checkbox"/> | <input type="checkbox"/> | <input type="checkbox"/> |
| Sons      | <input type="checkbox"/> | <input type="checkbox"/> | <input type="checkbox"/> | <input type="checkbox"/> |
| Daughters | <input type="checkbox"/> | <input type="checkbox"/> | <input type="checkbox"/> | <input type="checkbox"/> |

**2. Have any of your first degree relatives (including parents) had a diagnosis of cancer?**

☐ Yes      ☐ No      (If Yes, please provide details below. If No please go to section 3)

| <b>Type of cancer</b><br>Age at diagnosis | Father                   |                          | Mother                   |                          | First brother            |                          | First sister             |                          | First son<br>or<br>daughter |
|-------------------------------------------|--------------------------|--------------------------|--------------------------|--------------------------|--------------------------|--------------------------|--------------------------|--------------------------|-----------------------------|
|                                           | less than<br>60 yrs      | greater than<br>60 yrs   |                             |
| Brain                                     | <input type="checkbox"/>    |
| Head/Neck                                 | <input type="checkbox"/>    |
| Oesophagus                                | <input type="checkbox"/>    |
| Lung                                      | <input type="checkbox"/>    |
| Breast                                    | <input type="checkbox"/>    |
| Colon (Bowel)                             | <input type="checkbox"/>    |
| Other                                     | <input type="checkbox"/>    |

**SECTION 3 Questions about your smoking history****1. Have you ever smoked more than 10 cigarettes per week regularly?**

☐ Yes      ☐ No      (If No please go to question 5)

**2. How old were you when you first started smoking more than 10 cigarettes each week?**

☐ 10-19      ☐ 20-29      ☐ 30-39      ☐ 40-49      ☐ 50+

**3. How old were you when you stopped smoking cigarettes?**

☐ 10-19      ☐ 20-29      ☐ 30-39      ☐ 40-49      ☐ 50+      ☐ Still smoking

**4. Please indicate which types of cigarette and the number you have smoked**

|            |                          |                          |                          | Number per day           |                          |                          |                          |                          |                          |
|------------|--------------------------|--------------------------|--------------------------|--------------------------|--------------------------|--------------------------|--------------------------|--------------------------|--------------------------|
|            | Filter                   | Plain                    | Hand rolled              | 0-9                      | 10-19                    | 20-29                    | 30-39                    | 40-49                    | 50+                      |
| High Tar   | <input type="checkbox"/> |
| Low Tar    | <input type="checkbox"/> |
| Don't know | <input type="checkbox"/> |

---

---

5. **Have you ever smoked one or more cigars per day regularly?**

☐ Yes ☐ No (If No please go to question 9 below)

6. **How old were you when you first started smoking one or more cigars per day?**

☐ 10-19 ☐ 20-29 ☐ 30-39 ☐ 40-49 ☐ 50+

7. **How old were you when you stopped smoking cigars?**

☐ 10-19 ☐ 20-29 ☐ 30-39 ☐ 40-49 ☐ 50+ Still smoking

8. **How many cigars did you smoke per day?**

☐ 1-5 ☐ 6-10 ☐ 11-15 ☐ More than 15

9. **Have you ever smoked one or more pipes of tobacco per day regularly?**

☐ Yes ☐ No (If No please go to section 4)

10. **How old were you when you first started smoking a pipe?**

☐ 10-19 ☐ 20-29 ☐ 30-39 ☐ 40-49 ☐ 50+

11. **How old were you when you stopped smoking a pipe?**

☐ 10-19 ☐ 20-29 ☐ 30-39 ☐ 40-49 ☐ 50+ Still smoking

12. **How many ozs did you smoke each day?**

1/2 1 2 More than 2

#### SECTION 4 PREVIOUS X RAYS

1. **Have you had a previous X Ray in the Last 12 months**

☐ Yes ☐ No

2. **Have you had a previous CT scan in the last 12 months**

☐ Yes ☐ No

#### SECTION 5 Lung Cancer Screening

1. **If you are invited to have Lung Cancer Screening using a CT scan, how likely is it that you will accept an invitation?**

Highly likely ☐  
Quite likely ☐  
Unlikely ☐  
Definitely not ☐

2. **If you are a smoker, are you considering giving up smoking?**

Yes definitely ☐  
Yes possibly ☐  
Not really ☐  
Definitely not ☐

---

---

Supplementary Material 2

Derivation of α values for LLPv3

The original LLP model resulted in a risk score *r* of the form

$$\ln\left(\frac{r}{1-r}\right) = \alpha + \sum_i \beta_i$$

where  $\beta_i$  are a series of factors relating to particular risks, derived from the multivariate logistic regression model, and  $\alpha$  is an age- and sex-specific factor derived from lung cancer incidence rates in the Liverpool area.

For males, it is necessary to divide the risk score by  $1.86 \times 101.4 / 86.8 = 2.173$ , which is equivalent to deducting the natural logarithm of this value ie 0.78. For females, the adjustment factor is  $1.86 \times 57.9 / 67.0 = 1.607$ , with a corresponding natural logarithm of 0.47.

The  $\beta_i$  in LLPv3 are unchanged from the previous version of the model, and are shown in Table S1.

Table S1

| Risk factor / category                        | β-values |
|-----------------------------------------------|----------|
| Smoking duration                              |          |
| Never                                         | 0        |
| 1-19 years                                    | 0.7692   |
| 20-39 years                                   | 1.4516   |
| 40-59 years                                   | 2.5072   |
| 60 years or more                              | 2.7243   |
| History of pneumonia or other lung conditions |          |
| No                                            | 0        |
| Yes                                           | 0.6025   |
| Personal history of cancer                    |          |
| No                                            | 0        |
| Yes                                           | 0.6754   |
| Asbestos exposure                             |          |
| No                                            | 0        |
| Yes                                           | 0.6343   |
| Family history of lung cancer                 |          |
| None                                          | 0        |
| Early onset (before age 60)                   | 0.7034   |
| Late onset (on or after age 60)               | 0.1677   |

It is therefore necessary to reduce each  $\alpha$  value by 0.78 or 0.47 for males and females respectively. The original (LLPv2) and adjusted (LLP v3)  $\alpha$  values are shown in Table S2.

Table S2

$\alpha$ -values relating to 5-year absolute risk

|           | Male  |       | Female |        |
|-----------|-------|-------|--------|--------|
| Age group | LLPv2 | LLPv3 | LLPv2  | LLP 3  |
| 40-44     | -9.06 | -9.84 | -9.90  | -10.37 |
| 45-49     | -8.16 | -8.94 | -8.06  | -8.53  |
| 50-54     | -7.31 | -8.09 | -7.46  | -7.93  |
| 55-59     | -6.63 | -7.41 | -6.50  | -6.97  |
| 60-64     | -5.97 | -6.75 | -6.22  | -6.69  |
| 65-69     | -5.56 | -6.34 | -5.99  | -6.46  |
| 70-74     | -5.31 | -6.09 | -5.49  | -5.96  |
| 75-79     | -4.83 | -5.61 | -5.23  | -5.70  |
| 80-84     | -4.68 | -5.46 | -5.42  | -5.89  |

Supplementary Material 3

Derivation of input variables

|                            |                                                                                                                                                                                                                                                                                                                                                                                                                                                                                                                                                                                                                                                                                                                                                                                                                                                                                                                                                                                                                                                                                                                                                                                                                                                                                                                           |
|----------------------------|---------------------------------------------------------------------------------------------------------------------------------------------------------------------------------------------------------------------------------------------------------------------------------------------------------------------------------------------------------------------------------------------------------------------------------------------------------------------------------------------------------------------------------------------------------------------------------------------------------------------------------------------------------------------------------------------------------------------------------------------------------------------------------------------------------------------------------------------------------------------------------------------------------------------------------------------------------------------------------------------------------------------------------------------------------------------------------------------------------------------------------------------------------------------------------------------------------------------------------------------------------------------------------------------------------------------------|
| Input variable             | Derivation                                                                                                                                                                                                                                                                                                                                                                                                                                                                                                                                                                                                                                                                                                                                                                                                                                                                                                                                                                                                                                                                                                                                                                                                                                                                                                                |
| Age                        | Provided by PCT at time of recruitment                                                                                                                                                                                                                                                                                                                                                                                                                                                                                                                                                                                                                                                                                                                                                                                                                                                                                                                                                                                                                                                                                                                                                                                                                                                                                    |
| Sex                        | Provided by PCT at time of recruitment                                                                                                                                                                                                                                                                                                                                                                                                                                                                                                                                                                                                                                                                                                                                                                                                                                                                                                                                                                                                                                                                                                                                                                                                                                                                                    |
| Non-malignant lung disease | [Section 1 of questionnaire, question 1]<br><b>YES</b> , if <b>EITHER</b> : <ul style="list-style-type: none"><li>- Answered ‘yes’ to having had one or more of bronchitis, emphysema, pneumonia, tuberculosis or COPD; <b>AND/OR</b></li><li>- Specified an age at diagnosis for one or more of the above</li></ul> <b>NO</b> otherwise                                                                                                                                                                                                                                                                                                                                                                                                                                                                                                                                                                                                                                                                                                                                                                                                                                                                                                                                                                                  |
| Personal history of cancer | [Section 1 of questionnaire, questions 2 and 3]<br><b>YES</b> , if answered ‘yes’ to having had one or more of the following types of cancer: <ul style="list-style-type: none"><li>- Hodgkins disease, leukaemia, lymphoma, mesothelioma, brain, head/neck, oesophagus, lung, breast, colon (bowel), other (but <u>excluding</u> skin)</li></ul> <b>NO</b> otherwise                                                                                                                                                                                                                                                                                                                                                                                                                                                                                                                                                                                                                                                                                                                                                                                                                                                                                                                                                     |
| Exposure to asbestos       | [Section 1 of questionnaire, question 4]<br><b>YES</b> , if <b>EITHER</b> : <ul style="list-style-type: none"><li>- Answered ‘yes’ to having had a job or activity involving exposure to asbestos; <b>AND/OR</b></li><li>- Specified a period of exposure to asbestos</li></ul> <b>NO</b> otherwise                                                                                                                                                                                                                                                                                                                                                                                                                                                                                                                                                                                                                                                                                                                                                                                                                                                                                                                                                                                                                       |
| Family history of cancer   | [Section 2 of questionnaire, question 2]<br><b>YES, EARLY ONSET</b> , if at least one parent or sibling was diagnosed with at least one cancer before age 60, or a child at any age<br><b>YES, LATE ONSET</b> , if above conditions not met, but at least one parent or sibling was diagnosed with at least one cancer at age 60 or later<br><b>NO</b> otherwise                                                                                                                                                                                                                                                                                                                                                                                                                                                                                                                                                                                                                                                                                                                                                                                                                                                                                                                                                          |
| Smoking duration           | [Section 3 of questionnaire]<br>Set smoking duration to 0 if start age range and finish age range are <u>both</u> missing (even if answered ‘Yes’), for <u>all three</u> categories of smoking material (cigarettes, cigars, pipe)<br><br>Otherwise, for each category of smoking material:<br>Set start age based on specified range: <ul style="list-style-type: none"><li>○ Missing or 10-19 =&gt; 15</li><li>○ 20-29 =&gt; 25</li><li>○ 30-39 =&gt; 35</li><li>○ 40-49 =&gt; 45</li><li>○ 50+ =&gt; 50</li></ul> Set finish age based on specified range: <ul style="list-style-type: none"><li>○ 10-19 =&gt; 15</li><li>○ 20-29 =&gt; 25</li><li>○ 30-39 =&gt; 35</li><li>○ 40-49 =&gt; 45</li><li>○ 50+ =&gt; average of 50 and current age</li><li>○ Missing or still smoking =&gt; current age</li></ul><br>Determine earliest start age across the three categories (ignoring any for which start age range and finish age range are both missing)<br><br>Determine latest finish age across the three categories (ignoring any for which start age range and finish age range are both missing)<br><br>Calculate duration as (latest finish age) – (earliest start age), subject to a minimum of 1<br><br>Assign to appropriate smoking duration range (1-19 years, 20-39 years, 40-59 years, 60 years or more) |



Supplementary Material 4

Risk score ranges and observed and expected lung cancers by risk decile for LLPv2 and LLPv3, for males and females separately

(a) LLPv2

| Decile            | LLPv2 males           |                         |                                |                            | LLPv2 females         |                         |                            |                            |
|-------------------|-----------------------|-------------------------|--------------------------------|----------------------------|-----------------------|-------------------------|----------------------------|----------------------------|
|                   | Size of decile group* | Range of risk score (%) | Number of cancers observed (%) | Expected number of cancers | Size of decile group* | Range of risk score (%) | Number of cancers observed | Expected number of cancers |
| 1 (lowest risk)   | 3,849                 | 0.07-0.20               | 0 (0)                          | 5                          | 4,149                 | 0.06-0.16               | 0 (0)                      | 5                          |
| 2                 | 3,924                 | 0.21-0.35               | 6 (2)                          | 11                         | 3,987                 | 0.17-0.23               | 9 (3)                      | 8                          |
| 3                 | 3,577                 | 0.36-0.48               | 6 (2)                          | 15                         | 3,526                 | 0.24-0.30               | 5 (2)                      | 9                          |
| 4                 | 3,714                 | 0.49-0.69               | 10 (3)                         | 22                         | 3,759                 | 0.31-0.40               | 6 (2)                      | 13                         |
| 5                 | 3,928                 | 0.70-1.01               | 10 (3)                         | 32                         | 3,914                 | 0.41-0.50               | 12 (4)                     | 18                         |
| 6                 | 3,881                 | 1.02-1.55               | 21 (6)                         | 50                         | 3,854                 | 0.51-0.71               | 10 (4)                     | 23                         |
| 7                 | 3,501                 | 1.56-2.26               | 22 (7)                         | 65                         | 3,765                 | 0.72-1.01               | 12 (4)                     | 33                         |
| 8                 | 3,711                 | 2.27-3.70               | 45 (14)                        | 114                        | 3,814                 | 1.02-1.75               | 31 (11)                    | 50                         |
| 9                 | 3,723                 | 3.71-6.57               | 69 (21)                        | 187                        | 3,843                 | 1.76-3.36               | 57 (21)                    | 91                         |
| 10 (highest risk) | 3,717                 | 6.58-53.71              | 138 (42)                       | 439                        | 3,822                 | 3.37-39.72              | 130 (48)                   | 245                        |
| All               | 37,525                |                         | 327                            | 940                        | 38,433                |                         | 272                        | 495                        |

(b) LLPv3

| Decile            | LLPv3 males           |                         |                                |                            | LLPv3 females         |                         |                            |                            |
|-------------------|-----------------------|-------------------------|--------------------------------|----------------------------|-----------------------|-------------------------|----------------------------|----------------------------|
|                   | Size of decile group* | Range of risk score (%) | Number of cancers observed (%) | Expected number of cancers | Size of decile group* | Range of risk score (%) | Number of cancers observed | Expected number of cancers |
| 1 (lowest risk)   | 3,849                 | 0.03 – 0.09             | 0 (0)                          | 2                          | 4,239                 | 0.04 – 0.10             | 0 (0)                      | 3                          |
| 2                 | 3,924                 | 0.10 – 0.16             | 6 (2)                          | 5                          | 4,806                 | 0.11 – 0.15             | 9 (3)                      | 6                          |
| 3                 | 3,577                 | 0.17 – 0.22             | 6 (2)                          | 7                          | 2,775                 | 0.16 – 0.19             | 5 (2)                      | 5                          |
| 4                 | 3,714                 | 0.23 – 0.32             | 10 (3)                         | 10                         | 3,742                 | 0.20 – 0.25             | 6 (2)                      | 8                          |
| 5                 | 3,928                 | 0.33 – 0.47             | 10 (3)                         | 15                         | 3,767                 | 0.26 – 0.31             | 12 (4)                     | 11                         |
| 6                 | 3,881                 | 0.48 – 0.72             | 21 (6)                         | 23                         | 3,959                 | 0.32 – 0.45             | 10 (4)                     | 15                         |
| 7                 | 3,501                 | 0.73 – 1.05             | 22 (7)                         | 31                         | 3,635                 | 0.46 – 0.63             | 12 (4)                     | 20                         |
| 8                 | 3,711                 | 1.06 – 1.73             | 45 (14)                        | 52                         | 3,845                 | 0.64 – 1.10             | 31 (11)                    | 32                         |
| 9                 | 3,723                 | 1.74 – 3.12             | 69 (21)                        | 88                         | 3,843                 | 1.11 – 2.13             | 57 (21)                    | 57                         |
| 10 (highest risk) | 3,717                 | 3.13 – 34.72            | 138 (42)                       | 219                        | 3,822                 | 2.14 – 29.17            | 130 (48)                   | 158                        |
| All               | 37,525                |                         | 327                            | 453                        | 38,433                |                         | 272                        | 315                        |
